# Supplementary material
Source: MDPI journal article supplement (https://www.mdpi.com/2073-4344/10/1/60)
Supplement: s1 [file s1]

# A multi-enzymatic cascade reaction for the synthesis of vidarabine 5'-monophosphate

Marina Simona Robescu <sup>1</sup>, Immacolata Serra <sup>2\*</sup>, Marco Terreni <sup>1</sup>, Daniela Ubiali <sup>1\*</sup> and Teodora Bavaro <sup>1</sup>

<sup>1</sup> Department of Drug Sciences, University of Pavia, viale Taramelli 12, I-27100 Pavia, Italy; marinasimona.robescu@unipv.it (M.S.R.), marco.terreni@unipv.it (M.T.), teodora.bavaro@unipv.it (T.B.)

<sup>2</sup> Department of Food, Environmental and Nutritional Sciences, University of Milan, via Mangiagalli 25, I-20133 Milano, Italy

\* Correspondence: daniela.ubiali@unipv.it (D.U.); Tel.: +39-0382-987889; immacolata.serra@unimi.it (I.S.); Tel.: +39-02-50319248

## Supplementary Material

### Table of contents

|                                                                                                                                                                                                                                           |   |
|-------------------------------------------------------------------------------------------------------------------------------------------------------------------------------------------------------------------------------------------|---|
| S1. Comparison between the proposed three-enzyme cascade system and the previously reported transglycosylation [18] and phosphorylation [12] reactions.....                                                                               | 2 |
| S2. HPLC chromatograms of the multi-enzyme cascade reaction catalyzed by NPs and <i>DddAK</i> immobilized on glyoxyl-agarose (system a), and NPs on glyoxyl-agarose and <i>DddAK</i> on Sepabeads®-PEI-CL (system c) (endpoint: 6 h)..... | 3 |

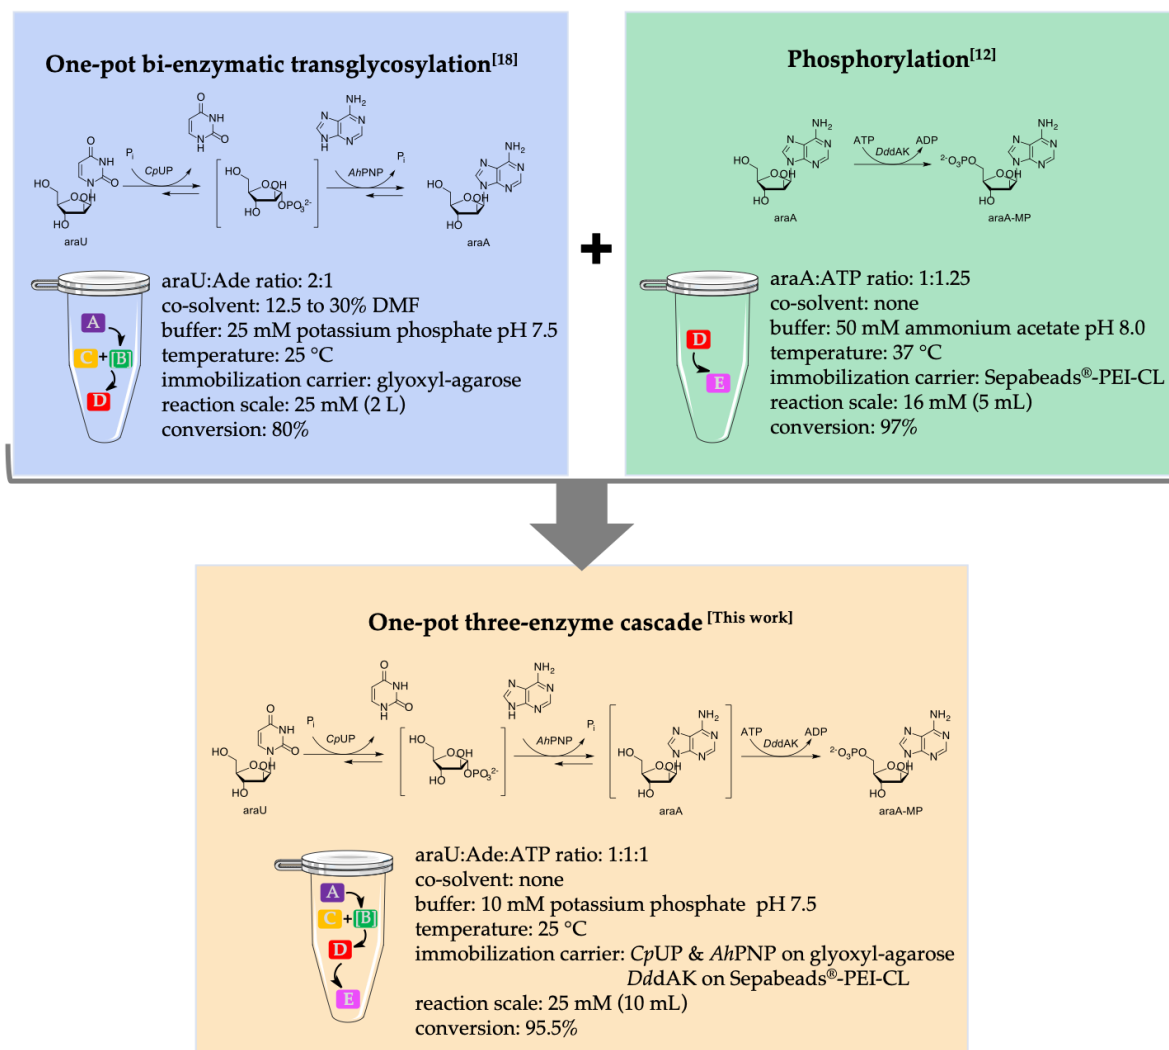

**Figure S1.** Comparison between the proposed three-enzyme cascade system and the previously reported transglycosylation [18] and phosphorylation [12] reactions.

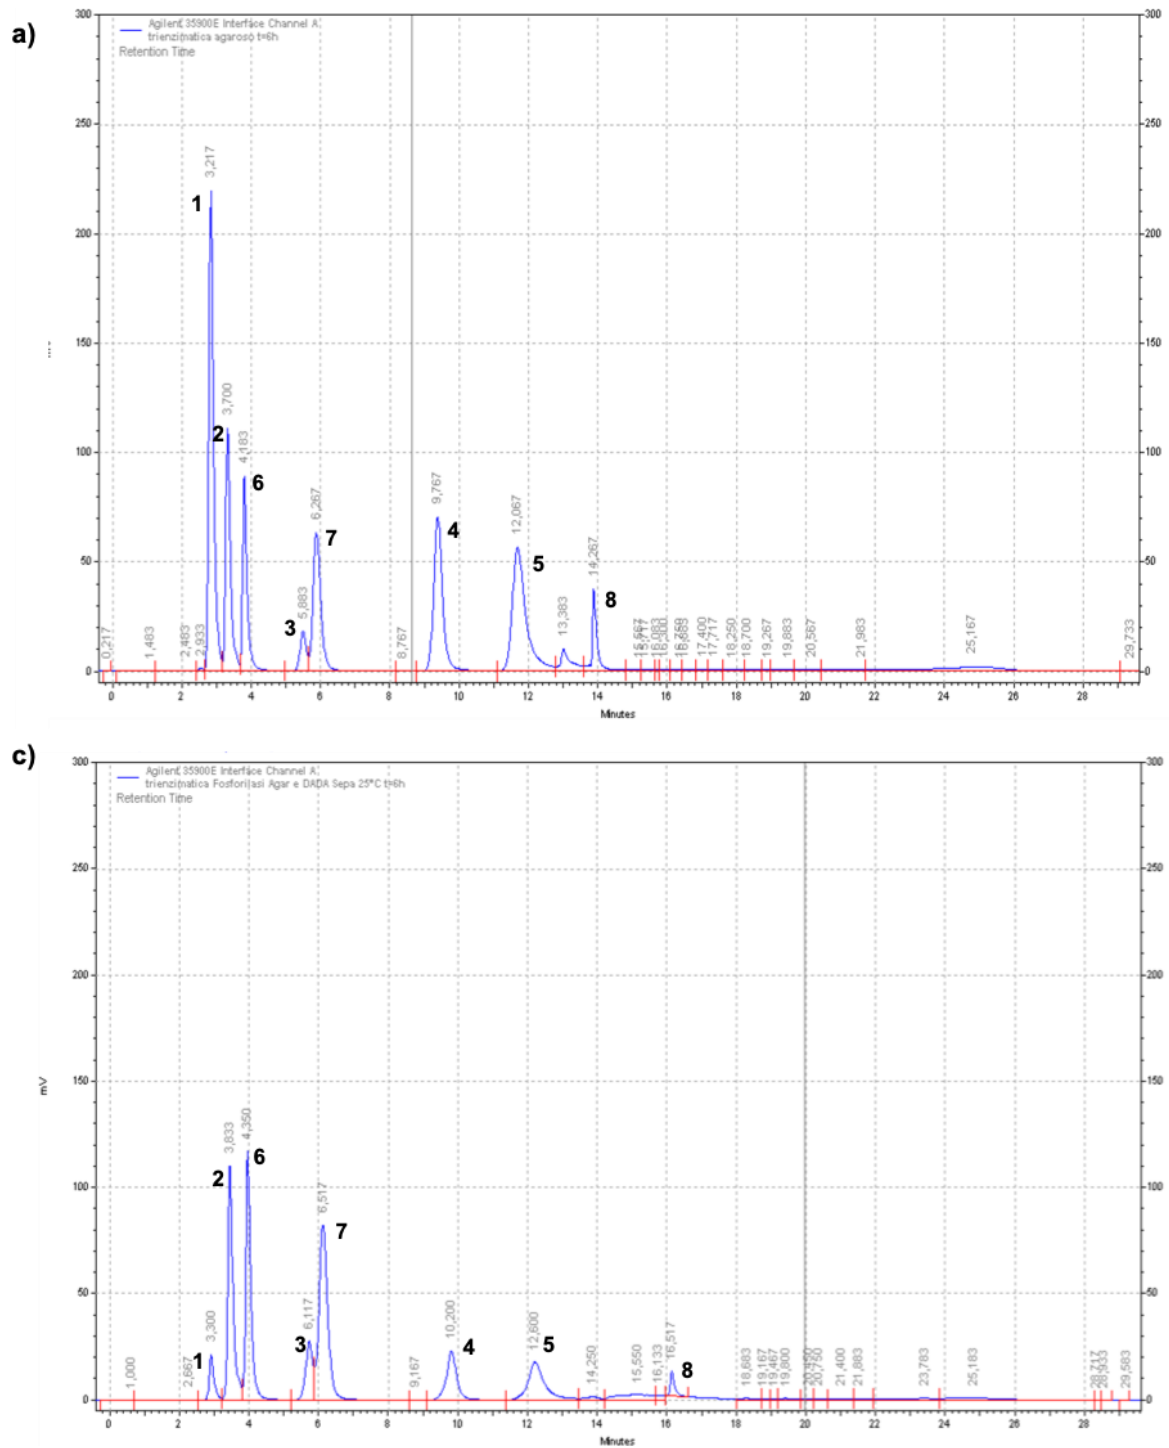

**Figure S2.** HPLC chromatograms of the multi-enzyme cascade reaction catalyzed by NPs and *DddAK* immobilized on glyoxyl-agarose (system a), and NPs on glyoxyl-agarose and *DddAK* on Sepabeads®-PEI-CL (system c) (endpoint: 6 h). ATP (1); ADP (2), AMP (3), ara-U (4), Ade (5), uracil (6), araA-MP (7), ara-A (8).
